# Supplementary material
Source: PubMed Central journal article supplement (PMC3339975)
Supplement: supp_M112.343962_jbc.M112.343962-1.pdf [file supp_M112.343962_jbc.M112.343962-1.pdf]

Subunit Interactions at the V<sub>1</sub>-V<sub>o</sub> Interface in the Yeast Vacuolar ATPase

Rebecca A. Oot and Stephan Wilkens

Supplementary Information

A

|                        |                                                                                                    |     |
|------------------------|----------------------------------------------------------------------------------------------------|-----|
| a <sub>NT</sub> (S.c.) | MAEKEEAIFRSAEMALVQFYI <b>PQEI</b> SRDSAYTLGQLGLVQFRDLNSKVRAFQRTF---VN                              | 57  |
| I <sub>NT</sub> (M.r.) | -----MEKLIVAGP <b>KRLARELLAELQKAGVV</b> HIDPL <b>RPDELGEYRL</b> SPTEEA                             | 47  |
|                        |                                                                                                    |     |
|                        |                                                                                                    |     |
| a <sub>NT</sub> (S.c.) | EIRRLDNVERQYRYFYSL <b>LKKHDI</b> KLYEGD <b>TDKYLDGSGELYVPPSGSV</b> IDDYVRNASYL                     | 117 |
| I <sub>NT</sub> (M.r.) | ELKRWEAVVSQAEQSLTVVGLATVPS-----SKPFTGS <b>LEEA</b> EAVLRPV                                         | 91  |
|                        |                                                                                                    |     |
| a <sub>NT</sub> (S.c.) | EERLIQMEDATDQIEVQKNDLEQYRFILQSGDEFFL <b>KGDNTDSTSYMDE</b> DMIDANGENIA                              | 177 |
| I <sub>NT</sub> (M.r.) | ASRAEVLGKERAAL <b>EEEEIQTI</b> ELFGKAAEK <b>LAALA</b> -----HG-----                                 | 128 |
|                        |                                                                                                    |     |
| a <sub>NT</sub> (S.c.) | AAIGASVNYVTGVIARDKV-ATLEQILW <b>RVL</b> RG <b>NLFF</b> KTVEIEQP <b>VYD</b> VKTREYKHKN <b>AF</b>    | 236 |
| I <sub>NT</sub> (M.r.) | LDESPRLGVIPFLVAKPEELEAVRKALQEALDRF <b>VLEAE</b> PLEN-----Q-LAA                                     | 176 |
|                        |                                                                                                    |     |
| a <sub>NT</sub> (S.c.) | IVFSHGDLIIK <b>RIRKIAESLD</b> ANLYD <b>VDSS</b> NEGRSQ--QLAKVNKNLSDLYTVLKT <b>TSTT</b>             | 294 |
| I <sub>NT</sub> (M.r.) | L <b>VVVKRS</b> -E <b>LEAAR</b> SSLSRLGLAELRFPGAYGAMPLG <b>KAAARM</b> KERARLAPEELVG <b>IREE</b>    | 235 |
|                        |                                                                                                    |     |
| a <sub>NT</sub> (S.c.) | LESELYAIAKELDSWFQDV <b>TREKAIFEIL</b> NKSNYD <b>TNRKIL</b> IAEGWIPRDELATLQARLG                     | 354 |
| I <sub>NT</sub> (M.r.) | VARLSRESGEALIALW <b>TRAKDE</b> VARYKAVADMA--AGKYGAALMGWVPQ <b>KAKG</b> KVEEALG                     | 293 |
|                        |                                                                                                    |     |
| a <sub>NT</sub> (S.c.) | EM <b>IAR</b> L <b>GIDVPSII</b> QVLD <b>TNHTPP</b> TFHRT <b>TKNF</b> TAGFQ <b>SICDCY</b> GIAQYREIN | 406 |
| I <sub>NT</sub> (M.r.) | RLR-----DQ <b>IVY</b>                                                                              | 301 |
|                        |                                                                                                    |     |

B

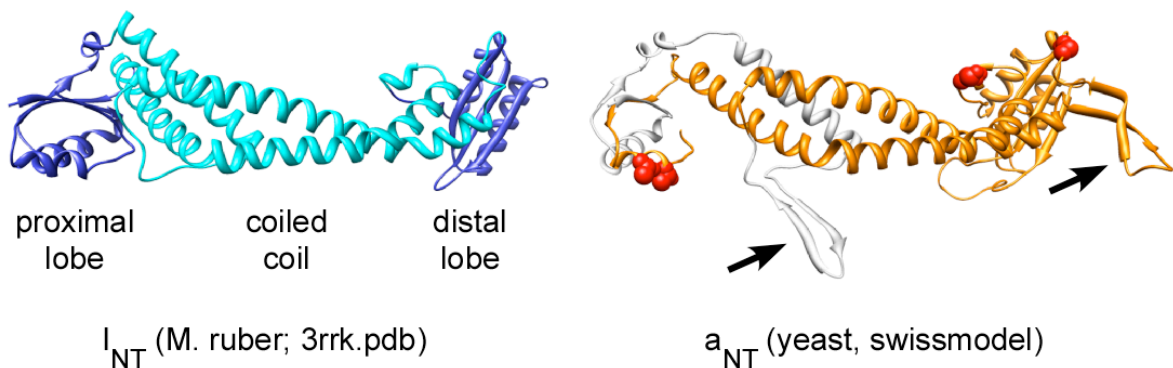

Figure S1: *A*, Primary sequence alignment of the N-terminal domains of *S. cerevisiae* Vph1p (1-406) and *M. ruber* subunit I(1-301). Secondary structure is shaded in blue and pink for  $\beta$  structure and  $\alpha$  helix, respectively. *B*, Vph1p primary sequence (1-357) threaded into the *M. ruber* I<sub>NT</sub> crystal structure (3rrk) using Swiss-Model (swissmodel.expasy.org). Left, ribbon representation of *M. ruber* I<sub>NT</sub> crystal structure with proximal and distal lobes colored in dark blue and the coiled coil domain in cyan. Right, model of Vph1p(1-357). Arrows point to Vph1p sequence elements not present in the *M. ruber* I<sub>NT</sub> domain. The sites from which photo crosslinks to subunits EG was observed are in red spacefill. The Vph1p construct analyzed here is highlighted in orange.
